# Supplementary material for: Microfluidic Droplet-Generation Device with Flexible Walls
Source: MDPI journal article supplement (doi:10.3390/mi14091770), 2023-09-15
Supplement: s1 [file s1]

# Microfluidic Droplet-Generation Device with Flexible Walls

Sajad Yazdanparast, Pouya Rezai \* and Alidad Amirfazli \*

Department of Mechanical Engineering, York University, Toronto, ON M3J 1P3, Canada

\* Correspondence: prezai@yorku.ca (P.R.); alidad2@yorku.ca (A.A.)

## Effect of $We_d$ on the Droplet Size

Analysis of variance (ANOVA) was conducted to confirm if  $We_d$  has a significant effect on the droplet size. ANOVA can explore a significant difference between two or more groups. At the presence of a significant difference, the  $p$ -value is less than 0.05, and the null hypothesis is rejected. The null hypothesis says that there is no difference among group means. Table S1 shows the  $p$ -values of the test. For  $Ca_c$ ,  $h/w$ , and  $Re_c$ ,  $p$ -values were less than 0.05; thus, one can reject the null hypothesis for these parameters. The  $P$ -value for  $We_d$  was higher than 0.05, implying the non-significant effect of  $We_d$ .

**Table S1.**  $P$ -values in the ANOVA test showing the significance of the effect of each parameter on the droplet size,  $D_d$ . The  $p$ -value for d-phase Weber number ( $We_d$ ) is more than 0.05, which shows a weak effect of  $We_d$  on  $D_d$ .

| Dimensionless Numbers | $p$ -Value |
|-----------------------|------------|
| $Ca_c$                | 0.002      |
| $h/w$                 | 0.047      |
| $Re_c$                | 0.006      |
| $We_d$                | 0.256      |
